# Supplementary material
Source: PubMed Central journal article supplement (PMC6889095)
Supplement: 13280_2019_1153_MOESM1_ESM.pdf [file 13280_2019_1153_MOESM1_ESM.pdf]

*Ambio*

Electronic Supplementary Material

*This supplementary material has not been peer reviewed.*

**Title: Storing and sharing: A review of Indigenous and Local Knowledge conservation initiatives**

Authors: Petra Benyei, Guadalupe Arreola, Victoria Reyes-García

ENTERED VARIABLES ONE BY ONE

INDUSTRIALIZED

```
glm(formula = P_Inclusiveness ~ L_Industrialized, family = binomial,
     data = TKCON_LOGIT)
```

Deviance Residuals:

| Min     | 1Q      | Median  | 3Q     | Max    |
|---------|---------|---------|--------|--------|
| -1.1483 | -0.6421 | -0.6421 | 0.2824 | 1.8333 |

Coefficients:

|                   | Estimate | Std. Error | z value | Pr(> z )     |
|-------------------|----------|------------|---------|--------------|
| (Intercept)       | -1.4744  | 0.2543     | -5.797  | 6.74e-09 *** |
| L_Industrialized1 | 1.4054   | 0.4503     | 3.121   | 0.0018 **    |

---

Signif. codes: 0 '\*\*\*' 0.001 '\*\*' 0.01 '\*' 0.05 '.' 0.1 ' ' 1

(Dispersion parameter for binomial family taken to be 1)

Null deviance: 147.88 on 130 degrees of freedom

Residual deviance: 138.25 on 129 degrees of freedom

(7 observations deleted due to missingness)

AIC: 142.25

Number of Fisher Scoring iterations: 4

IT

```
glm(formula = P_Inclusiveness ~ M_IT, family = binomial, data = TKCON_LOGIT)
```

Deviance Residuals:

| Min     | 1Q      | Median  | 3Q     | Max    |
|---------|---------|---------|--------|--------|
| -1.2858 | -0.5811 | -0.5811 | 0.2458 | 1.9298 |

Coefficients:

|             | Estimate | Std. Error | z value | Pr(> z )     |
|-------------|----------|------------|---------|--------------|
| (Intercept) | -1.6933  | 0.2720     | -6.225  | 4.81e-10 *** |
| M_IT21      | 1.9446   | 0.4483     | 4.338   | 1.44e-05 *** |

---

Signif. codes: 0 '\*\*\*' 0.001 '\*\*' 0.01 '\*' 0.05 '.' 0.1 ' ' 1

(Dispersion parameter for binomial family taken to be 1)

Null deviance: 152.38 on 134 degrees of freedom

Residual deviance: 132.82 on 133 degrees of freedom

(3 observations deleted due to missingness)

AIC: 136.82

Number of Fisher Scoring iterations: 3

TYPE ILK

```
glm(formula = P_Inclusiveness ~ I_TypeILK_2, family = binomial,
     data = TKCON_LOGIT)
```

Deviance Residuals:

| Min     | 1Q      | Median  | 3Q     | Max    |
|---------|---------|---------|--------|--------|
| -1.1073 | -0.7815 | -0.4783 | 0.4505 | 2.3804 |

Coefficients:

|             | Estimate | Std. Error | z value | Pr(> z ) |
|-------------|----------|------------|---------|----------|
| (Intercept) | -0.3185  | 0.4647     | -0.685  | 0.493    |
| I_TypeTK_22 | 0.1514   | 0.6195     | 0.244   | 0.807    |

|             |         |        |        |         |
|-------------|---------|--------|--------|---------|
| I_TypeTK_23 | -2.4541 | 1.1307 | -2.171 | 0.030 * |
| I_TypeTK_24 | -1.7918 | 0.7044 | -2.544 | 0.011 * |
| I_TypeTK_25 | -0.7112 | 0.5930 | -1.199 | 0.230   |

---

Signif. codes: 0 '\*\*\*' 0.001 '\*\*' 0.01 '\*' 0.05 '.' 0.1 ' ' 1

(Dispersion parameter for binomial family taken to be 1)

Null deviance: 152.38 on 134 degrees of freedom  
 Residual deviance: 135.72 on 130 degrees of freedom  
 (3 observations deleted due to missingness)  
 AIC: 145.72

Number of Fisher Scoring iterations: 5

APPROACH

glm(formula = P\_Inclusiveness ~ I\_ApproachGroup2, family = binomial,  
 data = TKCON\_LOGIT)

Deviance Residuals:

| Min     | 1Q      | Median  | 3Q     | Max    |
|---------|---------|---------|--------|--------|
| -1.2435 | -0.6905 | -0.6905 | 0.7631 | 2.5373 |

Coefficients:

|                   | Estimate | Std. Error | z value | Pr(> z ) |
|-------------------|----------|------------|---------|----------|
| (Intercept)       | -0.4055  | 0.6455     | -0.628  | 0.5299   |
| I_ApproachGroup22 | 0.1542   | 0.8189     | 0.188   | 0.8507   |
| I_ApproachGroup23 | 0.5596   | 0.8522     | 0.657   | 0.5114   |
| I_ApproachGroup24 | -2.7726  | 1.2074     | -2.296  | 0.0217 * |
| I_ApproachGroup25 | -0.9067  | 0.7123     | -1.273  | 0.2030   |

---

Signif. codes: 0 '\*\*\*' 0.001 '\*\*' 0.01 '\*' 0.05 '.' 0.1 ' ' 1

(Dispersion parameter for binomial family taken to be 1)

Null deviance: 147.30 on 129 degrees of freedom  
 Residual deviance: 129.94 on 125 degrees of freedom  
 (8 observations deleted due to missingness)  
 AIC: 139.94

Number of Fisher Scoring iterations: 5

MOST EXPLICATIVE = APPROACH -> KEEP ADDING...

APR + IT

glm(formula = P\_Inclusiveness ~ I\_ApproachGroup2 + M\_IT, family = binomial,  
 data = TKCON\_LOGIT)

Deviance Residuals:

| Min     | 1Q      | Median  | 3Q     | Max    |
|---------|---------|---------|--------|--------|
| -1.8862 | -0.4589 | -0.4589 | 0.3424 | 2.1462 |

Coefficients:

|                   | Estimate | Std. Error | z value | Pr(> z )     |
|-------------------|----------|------------|---------|--------------|
| (Intercept)       | -1.5610  | 0.8017     | -1.947  | 0.051504 .   |
| I_ApproachGroup22 | 1.0768   | 0.9461     | 1.138   | 0.255038     |
| I_ApproachGroup23 | 1.3242   | 0.9779     | 1.354   | 0.175688     |
| I_ApproachGroup24 | -1.8234  | 1.2893     | -1.414  | 0.157304     |
| I_ApproachGroup25 | -0.6368  | 0.8007     | -0.795  | 0.426430     |
| M_IT21            | 2.0783   | 0.5414     | 3.838   | 0.000124 *** |

---  
Signif. codes: 0 '\*\*\*' 0.001 '\*\*' 0.01 '\*' 0.05 '.' 0.1 ' ' 1

(Dispersion parameter for binomial family taken to be 1)

Null deviance: 147.30 on 129 degrees of freedom  
Residual deviance: 113.28 on 124 degrees of freedom  
(8 observations deleted due to missingness)  
AIC: 125.28

Number of Fisher Scoring iterations: 5

Analysis of Deviance Table

Model: binomial, link: logit

Response: P\_Inclusiveness

Terms added sequentially (first to last)

|                  | Df | Deviance | Resid. Df | Resid. Dev | Pr(>Chi)      |
|------------------|----|----------|-----------|------------|---------------|
| NULL             |    |          | 129       | 147.30     |               |
| I_ApproachGroup2 | 4  | 17.352   | 125       | 129.94     | 0.001651 **   |
| M_IT             | 1  | 16.663   | 124       | 113.28     | 4.465e-05 *** |

---

Signif. codes: 0 '\*\*\*' 0.001 '\*\*' 0.01 '\*' 0.05 '.' 0.1 ' ' 1

APPR + INDUST

```
glm(formula = P_Inclusiveness ~ I_ApproachGroup2 + L_Industrialized,  
     family = binomial, data = TKCON_LOGIT)
```

Deviance Residuals:

| Min     | 1Q      | Median  | 3Q     | Max    |
|---------|---------|---------|--------|--------|
| -1.5730 | -0.5528 | -0.5528 | 0.2583 | 2.0750 |

Coefficients:

|                   | Estimate | Std. Error | z value | Pr(> z )   |
|-------------------|----------|------------|---------|------------|
| (Intercept)       | -0.69315 | 0.70711    | -0.980  | 0.32696    |
| I_ApproachGroup22 | 0.25479  | 0.87892    | 0.290   | 0.77190    |
| I_ApproachGroup23 | 0.02339  | 0.96581    | 0.024   | 0.98068    |
| I_ApproachGroup24 | -2.90032 | 1.27512    | -2.275  | 0.02293 *  |
| I_ApproachGroup25 | -1.10806 | 0.80290    | -1.380  | 0.16756    |
| L_Industrialized1 | 1.56423  | 0.52473    | 2.981   | 0.00287 ** |

---

Signif. codes: 0 '\*\*\*' 0.001 '\*\*' 0.01 '\*' 0.05 '.' 0.1 ' ' 1

(Dispersion parameter for binomial family taken to be 1)

Null deviance: 143.38 on 126 degrees of freedom  
Residual deviance: 118.30 on 121 degrees of freedom  
(11 observations deleted due to missingness)  
AIC: 130.3

Number of Fisher Scoring iterations: 5

Analysis of Deviance Table

Model: binomial, link: logit

Response: P\_Inclusiveness

Terms added sequentially (first to last)

|                  | Df | Deviance | Resid. Df | Resid. Dev | Pr(>Chi)    |
|------------------|----|----------|-----------|------------|-------------|
| NULL             |    |          | 126       | 143.38     |             |
| I_ApproachGroup2 | 4  | 16.0033  | 122       | 127.38     | 0.003015 ** |
| L_Industrialized | 1  | 9.0753   | 121       | 118.30     | 0.002591 ** |

---

Signif. codes: 0 '\*\*\*' 0.001 '\*\*' 0.01 '\*' 0.05 '.' 0.1 ' ' 1

APR+TYPEILK

```
glm(formula = P_Inclusiveness ~ I_ApproachGroup2 + I_TypeILK_2,
     family = binomial, data = TKCON_LOGIT)
```

Deviance Residuals:

| Min     | 1Q      | Median  | 3Q     | Max    |
|---------|---------|---------|--------|--------|
| -1.4802 | -0.5734 | -0.3084 | 0.6479 | 3.1689 |

Coefficients:

|                   | Estimate | Std. Error | z value | Pr(> z ) |
|-------------------|----------|------------|---------|----------|
| (Intercept)       | -0.20054 | 0.79821    | -0.251  | 0.8016   |
| I_ApproachGroup22 | 0.78280  | 0.91149    | 0.859   | 0.3904   |
| I_ApproachGroup23 | -0.05401 | 1.02811    | -0.053  | 0.9581   |
| I_ApproachGroup24 | -3.14709 | 1.24757    | -2.523  | 0.0116 * |
| I_ApproachGroup25 | -0.51688 | 0.78263    | -0.660  | 0.5090   |
| I_TypeILK_22      | 0.87108  | 0.79222    | 1.100   | 0.2715   |
| I_TypeILK_23      | -2.30433 | 1.17009    | -1.969  | 0.0489 * |
| I_TypeILK_24      | -1.66669 | 0.74589    | -2.235  | 0.0254 * |
| I_TypeILK_25      | 0.10621  | 0.69346    | 0.153   | 0.8783   |

---

Signif. codes: 0 '\*\*\*' 0.001 '\*\*' 0.01 '\*' 0.05 '.' 0.1 ' ' 1

(Dispersion parameter for binomial family taken to be 1)

Null deviance: 147.30 on 129 degrees of freedom  
Residual deviance: 111.37 on 121 degrees of freedom  
(8 observations deleted due to missingness)  
AIC: 129.37

Number of Fisher Scoring iterations: 6

Analysis of Deviance Table

Model: binomial, link: logit

Response: P\_Inclusiveness

Terms added sequentially (first to last)

|                  | Df | Deviance | Resid. Df | Resid. Dev | Pr(>Chi)      |
|------------------|----|----------|-----------|------------|---------------|
| NULL             |    |          | 129       | 147.30     |               |
| I_ApproachGroup2 | 4  | 17.352   | 125       | 129.94     | 0.0016512 **  |
| I_TypeILK_2      | 4  | 18.576   | 121       | 111.37     | 0.0009517 *** |

---

Signif. codes: 0 '\*\*\*' 0.001 '\*\*' 0.01 '\*' 0.05 '.' 0.1 ' ' 1

2nd MOST EXPLICATIVE = IT... KEEP ADDING

APR+IT+ IND

```
glm(formula = P_Inclusiveness ~ I_ApproachGroup2 + M_IT + L_Industrialized,
     family = binomial, data = TKCON_LOGIT)
```

Deviance Residuals:

| Min     | 1Q      | Median  | 3Q     | Max    |
|---------|---------|---------|--------|--------|
| -1.6737 | -0.6904 | -0.4225 | 0.1313 | 2.2184 |

Coefficients:

|                   | Estimate | Std. Error | z value | Pr(> z )   |
|-------------------|----------|------------|---------|------------|
| (Intercept)       | -1.5722  | 0.8330     | -1.887  | 0.05913 .  |
| I_ApproachGroup22 | 0.9769   | 0.9759     | 1.001   | 0.31679    |
| I_ApproachGroup23 | 0.8683   | 1.0727     | 0.809   | 0.41829    |
| I_ApproachGroup24 | -2.0882  | 1.3560     | -1.540  | 0.12355    |
| I_ApproachGroup25 | -0.7992  | 0.8677     | -0.921  | 0.35701    |
| M_IT1             | 1.7128   | 0.5639     | 3.037   | 0.00239 ** |
| L_Industrialized1 | 1.0587   | 0.5625     | 1.882   | 0.05981 .  |

Signif. codes: 0 '\*\*\*' 0.001 '\*\*' 0.01 '\*' 0.05 '.' 0.1 ' ' 1

(Dispersion parameter for binomial family taken to be 1)

Null deviance: 143.38 on 126 degrees of freedom  
 Residual deviance: 108.44 on 120 degrees of freedom  
 (11 observations deleted due to missingness)  
 AIC: 122.44

Number of Fisher Scoring iterations: 6

Analysis of Deviance Table

Model: binomial, link: logit

Response: P\_Inclusiveness

Terms added sequentially (first to last)

|                  | Df | Deviance | Resid. Df | Resid. Dev | Pr(>Chi)      |
|------------------|----|----------|-----------|------------|---------------|
| NULL             |    |          | 126       | 143.38     |               |
| I_ApproachGroup  | 4  | 16.0033  | 122       | 127.38     | 0.003015 **   |
| M_IT             | 1  | 15.4093  | 121       | 111.97     | 8.656e-05 *** |
| L_Industrialized | 1  | 3.5263   | 120       | 108.44     | 0.060401 .    |

Signif. codes: 0 '\*\*\*' 0.001 '\*\*' 0.01 '\*' 0.05 '.' 0.1 ' ' 1

APR+IT+TYPEILK

```
glm(formula = P_Inclusiveness ~ I_ApproachGroup2 + M_IT + I_TypeILK_2,
     family = binomial, data = TKCON_LOGIT)
```

Deviance Residuals:

| Min     | 1Q      | Median  | 3Q     | Max    |
|---------|---------|---------|--------|--------|
| -1.4998 | -0.6777 | -0.2913 | 0.2962 | 2.5223 |

Coefficients:

|                   | Estimate | Std. Error | z value | Pr(> z )   |
|-------------------|----------|------------|---------|------------|
| (Intercept)       | -1.18891 | 0.93647    | -1.270  | 0.20424    |
| I_ApproachGroup22 | 1.57824  | 1.02160    | 1.545   | 0.12238    |
| I_ApproachGroup23 | 1.38030  | 1.20337    | 1.147   | 0.25137    |
| I_ApproachGroup24 | -1.93303 | 1.33105    | -1.452  | 0.14643    |
| I_ApproachGroup25 | -0.14515 | 0.86626    | -0.168  | 0.86693    |
| M_IT1             | 1.92095  | 0.64367    | 2.984   | 0.00284 ** |

|              |          |         |        |           |
|--------------|----------|---------|--------|-----------|
| I_TypeILK_22 | -0.22413 | 0.90469 | -0.248 | 0.80433   |
| I_TypeILK_23 | -2.17974 | 1.20666 | -1.806 | 0.07085 . |
| I_TypeILK_24 | -1.80458 | 0.80052 | -2.254 | 0.02418 * |
| I_TypeILK_25 | 0.06384  | 0.74417 | 0.086  | 0.93164   |

---  
Signif. codes: 0 '\*\*\*' 0.001 '\*\*' 0.01 '\*' 0.05 '.' 0.1 ' ' 1

(Dispersion parameter for binomial family taken to be 1)

Null deviance: 147.30 on 129 degrees of freedom  
Residual deviance: 101.65 on 120 degrees of freedom  
(8 observations deleted due to missingness)  
AIC: 121.65

Number of Fisher Scoring iterations: 5

Analysis of Deviance Table

Model: binomial, link: logit

Response: P\_Inclusiveness

Terms added sequentially (first to last)

|                  | Df | Deviance | Resid. Df | Resid. Dev | Pr(>Chi)      |
|------------------|----|----------|-----------|------------|---------------|
| NULL             |    |          | 129       | 147.30     |               |
| I_ApproachGroup2 | 4  | 17.352   | 125       | 129.94     | 0.001651 **   |
| M_IT             | 1  | 16.663   | 124       | 113.28     | 4.465e-05 *** |
| I_TypeILK_2      | 4  | 11.630   | 120       | 101.65     | 0.020325 *    |

---  
Signif. codes: 0 '\*\*\*' 0.001 '\*\*' 0.01 '\*' 0.05 '.' 0.1 ' ' 1

3rd MOST EXPLICATIVE TypeILK

FINAL APP+IT+ILK+IND

glm(formula = P\_Inclusiveness ~ I\_ApproachGroup2 + M\_IT + I\_TypeILK\_2 +  
L\_Industrialized, family = binomial, data = TKCON\_LOGIT)

Deviance Residuals:

|         |         |         |        |        |
|---------|---------|---------|--------|--------|
| Min     | 1Q      | Median  | 3Q     | Max    |
| -2.0043 | -0.6242 | -0.2907 | 0.1876 | 2.5240 |

Coefficients:

|                   | Estimate | Std. Error | z value | Pr(> z ) |
|-------------------|----------|------------|---------|----------|
| (Intercept)       | -1.20417 | 0.95191    | -1.265  | 0.2059   |
| I_ApproachGroup22 | 1.47792  | 1.04950    | 1.408   | 0.1591   |
| I_ApproachGroup23 | 1.31100  | 1.24515    | 1.053   | 0.2924   |
| I_ApproachGroup24 | -2.10874 | 1.36291    | -1.547  | 0.1218   |
| I_ApproachGroup25 | -0.10437 | 0.91704    | -0.114  | 0.9094   |
| M_IT1             | 1.62991  | 0.65868    | 2.475   | 0.0133 * |
| I_TypeILK_22      | -1.16326 | 1.05571    | -1.102  | 0.2705   |
| I_TypeILK_23      | -2.77658 | 1.29252    | -2.148  | 0.0317 * |
| I_TypeILK_24      | -1.83455 | 0.79526    | -2.307  | 0.0211 * |
| I_TypeILK_25      | 0.02629  | 0.75359    | 0.035   | 0.9722   |
| L_Industrialized1 | 1.51686  | 0.77800    | 1.950   | 0.0512 . |

---  
Signif. codes: 0 '\*\*\*' 0.001 '\*\*' 0.01 '\*' 0.05 '.' 0.1 ' ' 1

(Dispersion parameter for binomial family taken to be 1)

Null deviance: 143.380 on 126 degrees of freedom  
 Residual deviance: 96.262 on 116 degrees of freedom  
 (11 observations deleted due to missingness)  
 AIC: 118.26

Number of Fisher Scoring iterations: 6

Analysis of Deviance Table

Model: binomial, link: logit

Response: P\_Inclusiveness

Terms added sequentially (first to last)

|                  | Df | Deviance | Resid. Df | Resid. Dev | Pr(>Chi)      |
|------------------|----|----------|-----------|------------|---------------|
| NULL             |    |          | 126       | 143.380    |               |
| I_ApproachGroup2 | 4  | 16.0033  | 122       | 127.377    | 0.003015 **   |
| M_IT             | 1  | 15.4093  | 121       | 111.967    | 8.656e-05 *** |
| I_TypeILK_2      | 4  | 11.6648  | 117       | 100.302    | 0.020026 *    |
| L_Industrialized | 1  | 4.0405   | 116       | 96.262     | 0.044419 *    |

---

Signif. codes: 0 '\*\*\*' 0.001 '\*\*' 0.01 '\*' 0.05 '.' 0.1 ' ' 1

CHECK WITH AUTOMATIC DROP METHOD

drop(reducedlogit)

Call: glm(formula = P\_Inclusiveness ~ I\_ApproachGroup2 + M\_IT + I\_TypeILK\_2 + L\_Industrialized, family = binomial, data = TKCON\_LOGIT)

Coefficients:

|                   |                   |                   |                   |
|-------------------|-------------------|-------------------|-------------------|
| (Intercept)       | I_ApproachGroup22 | I_ApproachGroup23 | I_ApproachGroup24 |
| -1.20417          | 1.47792           | 1.31100           | -2.10874          |
| I_ApproachGroup25 | M_IT1             | I_TypeILK_22      | I_TypeILK_23      |
| -0.10437          | 1.62991           | -1.16326          | -2.77658          |
| I_TypeILK_24      | I_TypeILK_25      | L_Industrialized1 |                   |
| -1.83455          | 0.02629           | 1.51686           |                   |

Degrees of Freedom: 126 Total (i.e. Null); 116 Residual  
 (11 observations deleted due to missingness)

Null Deviance: 143.4  
 Residual Deviance: 96.26 AIC: 118.3

CHECK DELTA AIC AND AIC WEIGHT

```
> model.names <- c("1 Approach", "2 Approach + IT", "3 Approach + IT + TypeILK",
"4 Approach + IT + TypeILK + Industrialized")
> install.packages("bbmle")
> reported.table <- bbmle::AICtab(m1, m2, m3, m4, weights = TRUE, sort = FALSE,
mnames = model.names)
> reported.table
```

|                                            | dAIC | df | weight |
|--------------------------------------------|------|----|--------|
| 1 Approach                                 | 23.1 | 2  | <0.001 |
| 2 Approach + IT                            | 7.1  | 3  | 0.02   |
| 3 Approach + IT + TypeILK                  | 1.8  | 4  | 0.28   |
| 4 Approach + IT + TypeILK + Industrialized | 0.0  | 5  | 0.70   |

```
>
```



WE KEEP ALL PARAMETERS IN FINAL MODEL

CHECK EFFECTS (CONVERTED ODDS-RATIO)

```
> allEffects(reducedlogit)
model: P_Inclusiveness ~ I_ApproachGroup2 + M_IT + I_TypeILK_2 +
L_Industrialized
```

I\_ApproachGroup2 effect

```
I_ApproachGroup2
      1      2      3      4      5
0.17588114 0.48335936 0.44188734 0.02525275 0.16126070
```

M\_IT effect

```
M_IT
      0      1
0.1129402 0.3938542
```

I\_TypeILK\_2 effect

```
I_TypeILK_2
      1      2      3      4      5
0.35335833 0.14584445 0.03289803 0.08025716 0.35938787
```

L\_Industrialized effect

```
L_Industrialized
      0      1
0.1168706 0.3762384
```

```
> plot (allEffects(reducedlogit))
```

CHECK MULTICOLINEARITY WITH VIF

```
> vif(reducedlogit)
I_ApproachGroup22 I_ApproachGroup23 I_ApproachGroup24 I_ApproachGroup25
      2.597337      3.111756      1.635419      3.189842
      M_IT1      I_TypeILK_22      I_TypeILK_23      I_TypeILK_24
      1.516073      3.134921      1.378569      1.554636
      I_TypeILK_25 L_Industrialized1
      1.667774      1.892718
```

NONE HIGHER THAN 5

CHECK RESIDUAL CORRELATION

```
> durbinWatsonTest(reducedlogit)
lag Autocorrelation D-W Statistic p-value
  1      0.05876117      1.873431      0.398
Alternative hypothesis: rho != 0
```

NO REJECTION OF H0=INDEPENDENCE OF RESIDUALS
